# Supplementary material for: Associations between Maternal Iron Supplementation in Pregnancy and Changes in Offspring Size at Birth Reflect Those of Multiple Micronutrient Supplementation
Source: MDPI journal article supplement (doi:10.3390/nu13072480), 2021-07-20
Supplement: s1 [file s1]

**Supplementary Figures and Tables for Petry et al., “Associations between Maternal Iron Supplementation in Pregnancy and Changes in Offspring Size at Birth Reflect those of Multiple Micronutrient Supplementation”**

**Figure S1** (a) The time, relative to the start of pregnancy, when iron supplementation was started in those women who did supplement, and (b) The total length of time that these women supplemented with iron.

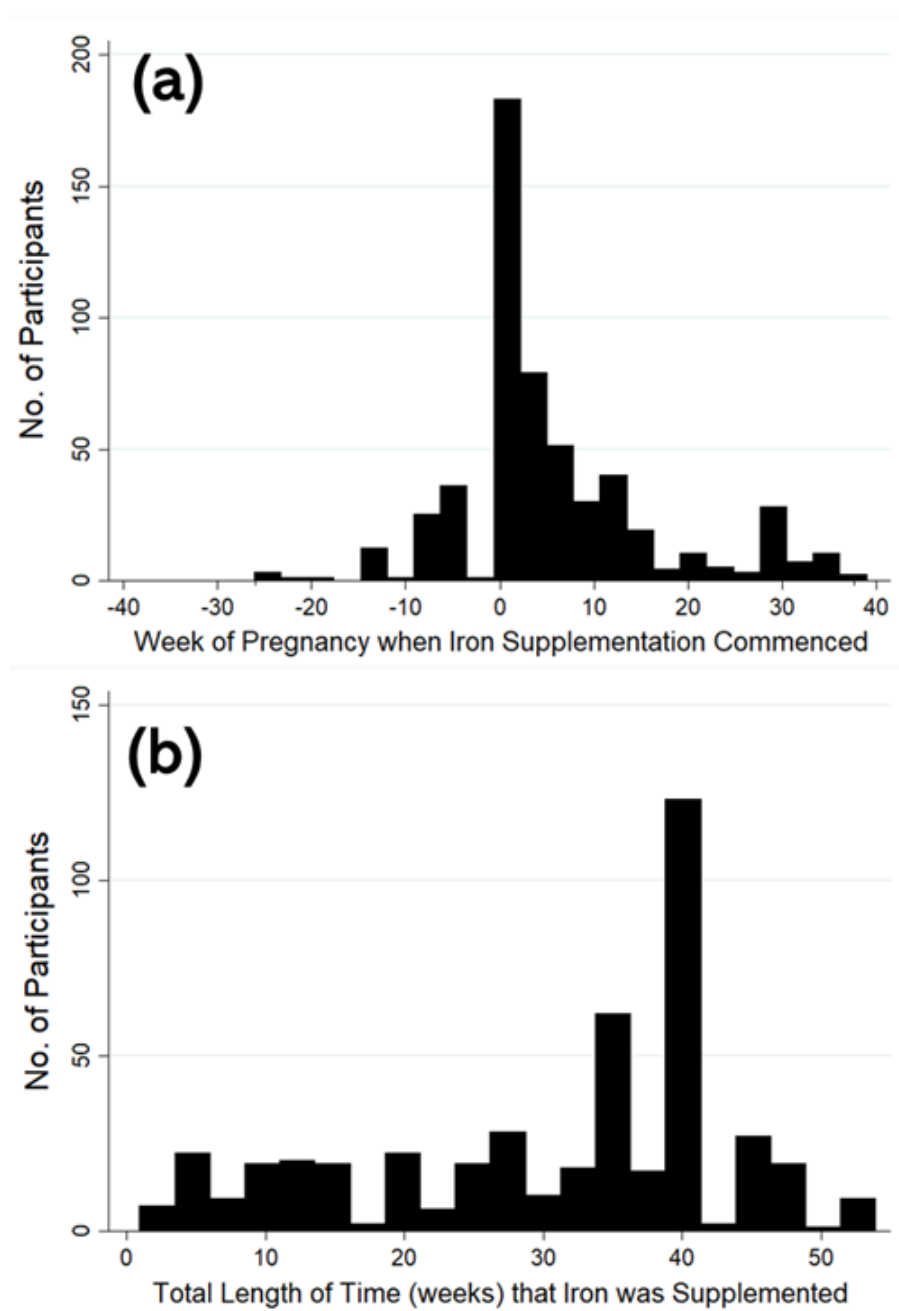

**Table S1** Comparison of characteristics of those that were included in this present analysis and those that were excluded from it.

| Characteristic                                  | Excluded from this analysis    | Included in this analysis      | <i>p</i> -value         |
|-------------------------------------------------|--------------------------------|--------------------------------|-------------------------|
| Age (years)                                     | 33.6 (33.2—34.0)<br>(n=437)    | 33.5 (33.2—33.7)<br>(n=898)    | 0.5                     |
| Maternal pre-pregnancy BMI (kg/m <sup>2</sup> ) | 24.2 (23.7—24.7)<br>(n=315)    | 24.0 (23.7—24.3)<br>(n=872)    | 0.6                     |
| Weight gain during pregnancy (kg)               | 7.5 (6.6—8.4)<br>(n=226)       | 8.5 (8.0—9.0)<br>(n=648)       | 0.06                    |
| Smoked during pregnancy (n)                     | 55 yes, 663 no                 | 31 yes, 936 no                 | 1.5 x 10 <sup>-5</sup>  |
| Gestational diabetes (n)                        | 43 yes, 364 no                 | 68 yes, 609 no                 | 0.8                     |
| Gestational hypertension (n)                    | 17 yes, 229 no                 | 27 yes, 447 no                 | 0.5                     |
| Preeclampsia (n)                                | 7 yes, 681 no                  | 15 yes, 970 no                 | 0.3                     |
| Multifetal pregnancy (n)                        | 50 twin, 647 singleton         | 0 twin, 985 singleton          | 1.2 x 10 <sup>-16</sup> |
| Gestational age at birth of offspring (weeks)*  | 39.7 (39.6—39.9)<br>(n=689)    | 39.8 (39.7—39.9)<br>(n=968)    | 0.2                     |
| Adjusted offspring birth weight (kg)**          | 3.484 (3.434—3.533)<br>(n=314) | 3.473 (3.444—3.503)<br>(n=870) | 0.7                     |

Data are numbers of participants or mean (95% confidence interval)

\*adjusted for twin pregnancies

\*\*adjusted for gestational age at birth, parity, sex, smoking, maternal BMI and twin pregnancies

**Table S2** Effect of including specific food frequency intakes as confounders in the logistic regression models describing the relationship between iron supplementation during pregnancy and risk of GDM in the Cambridge Baby Growth Study.

| Food/Drink type            | N   | Relative Risk    | <i>p</i> -value |
|----------------------------|-----|------------------|-----------------|
| None                       | 677 | 1.67 (1.01–2.77) | 0.048           |
| Baked beans                | 671 | 1.68 (1.02–2.79) | 0.044           |
| Bean curd                  | 668 | 1.68 (1.01–2.80) | 0.046           |
| Beer                       | 647 | 1.81 (1.07–3.07) | 0.03            |
| Canned fish                | 671 | 1.67 (1.01–2.78) | 0.047           |
| Canned meat                | 670 | 1.67 (1.00–2.76) | 0.049           |
| Canned (non-baked) beans   | 668 | 1.57 (0.94–2.61) | 0.09            |
| Chocolate                  | 668 | 1.63 (0.98–2.71) | 0.06            |
| Cocoa                      | 646 | 1.77 (1.04–3.01) | 0.04            |
| Coffee                     | 663 | 1.72 (1.02–2.88) | 0.04            |
| Cola                       | 650 | 1.71 (1.01–2.91) | 0.047           |
| Dried fruit                | 669 | 1.73 (1.04–2.87) | 0.04            |
| Eggs                       | 672 | 1.67 (1.00–2.77) | 0.049           |
| Fish                       | 669 | 1.67 (1.01–2.77) | 0.046           |
| Fresh fruit                | 672 | 1.65 (0.99–2.74) | 0.05            |
| Fresh fruit juice          | 667 | 1.66 (1.00–2.76) | 0.05            |
| Fresh green vegetables     | 669 | 1.64 (0.99–2.72) | 0.06            |
| Fresh non-green vegetables | 670 | 1.66 (1.00–2.75) | 0.05            |
| Frozen vegetables          | 670 | 1.66 (1.00–2.76) | 0.049           |
| Hard cheese                | 672 | 1.66 (1.00–2.75) | 0.05            |
| Liver                      | 671 | 1.63 (0.99–2.71) | 0.06            |

|                   |     |                  |       |
|-------------------|-----|------------------|-------|
| Meat              | 671 | 1.67 (1.00—2.77) | 0.049 |
| Organic food      | 668 | 1.68 (1.01—2.81) | 0.047 |
| Poultry           | 670 | 1.66 (1.00—2.75) | 0.05  |
| Pulses            | 670 | 1.61 (0.97—2.69) | 0.07  |
| Salad             | 662 | 1.62 (0.98—2.70) | 0.06  |
| Shellfish         | 664 | 1.62 (0.97—2.69) | 0.06  |
| Soft cheese       | 655 | 1.63 (0.98—2.72) | 0.06  |
| Soya              | 669 | 1.61 (0.97—2.69) | 0.07  |
| Spirits           | 647 | 1.64 (0.97—2.77) | 0.06  |
| Tea               | 659 | 1.74 (1.02—2.96) | 0.04  |
| Tinned fruit      | 669 | 1.67 (1.01—2.77) | 0.048 |
| Tinned vegetables | 672 | 1.69 (1.02—2.81) | 0.04  |
| White fish        | 667 | 1.64 (0.99—2.72) | 0.06  |
| Wine              | 654 | 1.75 (1.03—2.97) | 0.04  |
| Yogurt            | 669 | 1.63 (0.98—2.71) | 0.06  |

Data are either individual numbers or means (95% confidence intervals).

**Table S3** Associations between iron supplementation status in pregnancy and indices of offspring size at birth.

| Measure                              | No Maternal Iron Supplementation in Pregnancy | Maternal Iron Supplementation (not Multiple Micronutrients) in Pregnancy | Standardized $\beta$  | p-value |
|--------------------------------------|-----------------------------------------------|--------------------------------------------------------------------------|-----------------------|---------|
| Weight (kg)                          | 3.443 (3.396–3.489)<br>(n=345)                | 3.523 (3.413–3.633)<br>(n=63)                                            | 0.053 (-0.026–0.133)  | 0.2     |
| Length* (cm)                         | 51.3 (51.1–51.5)<br>(n=332)                   | 51.7 (51.3–52.2)<br>(n=61)                                               | 0.041 (-0.025–0.107)  | 0.2     |
| Head circumference* (cm)             | 35.2 (35.1–35.3)<br>(n=332)                   | 35.4 (35.1–35.7)<br>(n=61)                                               | 0.030 (-0.037–0.096)  | 0.4     |
| BMI* (kg/m <sup>2</sup> )            | 13.0 (12.9–13.2)<br>(n=331)                   | 13.2 (12.8–13.5)<br>(n=60)                                               | 0.044 (-0.035–0.123)  | 0.3     |
| Ponderal index* (kg/m <sup>3</sup> ) | 25.4 (25.1–25.7)<br>(n=331)                   | 25.5 (24.8–26.1)<br>(n=60)                                               | 0.022 (-0.52–0.096)   | 0.6     |
| Flank skinfold thickness* (mm)       | 6.0 (5.8–6.1)<br>(n=333)                      | 6.2 (5.8–6.7)<br>(n=61)                                                  | 0.040 (-0.054–0.133)  | 0.4     |
| Quadriceps skinfold thickness* (mm)  | 7.8 (7.5–8.0)<br>(n=332)                      | 7.9 (7.3–8.4)<br>(n=61)                                                  | -0.003 (-0.084–0.078) | 0.9     |
| Subscapular skinfold thickness* (mm) | 5.2 (5.1–5.4)<br>(n=333)                      | 5.6 (5.3–6.0)<br>(n=61)                                                  | 0.097 (0.008–0.186)   | 0.03    |
| Triceps skinfold thickness* (mm)     | 5.3 (5.2–5.5)<br>(n=333)                      | 5.5 (5.2–5.8)<br>(n=61)                                                  | 0.023 (-0.066–0.113)  | 0.6     |

Standardized  $\beta$ s are presented as means (95% confidence intervals). All models adjusted for gestational age at birth, parity, smoking during pregnancy, offspring sex and maternal pre-pregnancy BMI. \*Models additionally adjusted for age at assessment.

**Table S4** Associations of iron supplementation in pregnancy with (a) outcomes of pregnancy and (b) offspring size at birth and adiposity, in women and babies without reported maternal anaemia.

(a)

| Pregnancy Outcome        | N   | Risk Ratio        | p-value |
|--------------------------|-----|-------------------|---------|
| Gestational diabetes     | 626 | 1.70 (1.01—2.86)  | 0.045   |
| Pre-eclampsia            | 906 | 0.78 (0.28—2.12)  | 0.6     |
| Gestational hypertension | 450 | 0.98 (0.45—2.14)  | 1.0     |
| Low birth weight         | 895 | 0.80 (0.36—1.77)  | 0.6     |
| SGA                      | 895 | 2.04 (0.21—19.50) | 0.5     |
| Premature birth          | 897 | 0.87 (0.33—2.33)  | 0.8     |

(b)

| Measure                              | No Maternal Iron Supplementation in Pregnancy | Maternal Iron Supplementation in Pregnancy | Standardized $\beta$ | p-value |
|--------------------------------------|-----------------------------------------------|--------------------------------------------|----------------------|---------|
| Weight (kg)                          | 3.436 (3.389—3.484)<br>(n=327)                | 3.520 (3.481—3.559)<br>(n=481)             | 0.075 (0.019—0.131)  | 0.008   |
| Length* (cm)                         | 51.3 (51.1—51.5)<br>(n=315)                   | 51.5 (51.3—51.7)<br>(n=473)                | 0.045 (-0.006—0.095) | 0.08    |
| Head circumference*                  | 35.2 (35.0—35.3)<br>(n=315)                   | 35.4 (35.2—35.5)<br>(n=473)                | 0.053 (0.003—0.102)  | 0.04    |
| BMI* (kg/m <sup>2</sup> )            | 13.0 (12.9—13.2)<br>(n=314)                   | 13.2 (13.1—13.3)<br>(n=472)                | 0.059 (0.005—0.113)  | 0.03    |
| Ponderal index* (kg/m <sup>3</sup> ) | 25.5 (25.2—25.7)<br>(n=314)                   | 25.7 (25.5—26.0)<br>(n=472)                | 0.040 (-0.012—0.093) | 0.1     |
| Flank skinfold thickness* (mm)       | 6.0 (5.8—6.1)                                 | 6.2 (6.0—6.3)                              | 0.062 (-0.001—0.125) | 0.05    |

|                                            | (n=316)                  | (n=472)                  |                          |       |
|--------------------------------------------|--------------------------|--------------------------|--------------------------|-------|
| Quadriiceps<br>skinfold thickness*<br>(mm) | 7.8 (7.5—8.0)<br>(n=315) | 8.0 (7.8—8.2)<br>(n=473) | 0.046 (-0.009—<br>0.101) | 0.1   |
| Subscapular<br>skinfold thickness*<br>(mm) | 5.2 (5.1—5.3)<br>(n=316) | 5.4 (5.3—5.6)<br>(n=472) | 0.084 (0.022—<br>0.146)  | 0.008 |
| Triceps skinfold<br>thickness* (mm)        | 5.3 (5.2—5.5)<br>(n=316) | 5.6 (5.5—5.7)<br>(n=472) | 0.091 (0.028—<br>0.154)  | 0.005 |

Data are mean (95% confidence interval) or number of participants.

All models in (b) adjusted for gestational age at birth, parity, smoking during pregnancy, offspring sex and maternal pre-pregnancy BMI. \*Models additionally adjusted for age at assessment.

**Table S5** Subgroup comparison assessing the effect of maternal GDM on associations between iron supplementation in pregnancy and offspring size at birth.

| Measure                         | N   | Unadjusted for GDM      |         | Adjusted for GDM     |         |
|---------------------------------|-----|-------------------------|---------|----------------------|---------|
|                                 |     | Standardized $\beta$    | p-value | Standardized $\beta$ | p-value |
| Weight                          | 608 | 0.072<br>(0.007—0.137)  | 0.03    | 0.058 (-0.006—0.123) | 0.08    |
| Length*                         | 591 | 0.029<br>(-0.029—0.087) | 0.3     | 0.022 (-0.036—0.080) | 0.5     |
| Head Circumference*             | 592 | 0.042<br>(-0.016—0.101) | 0.2     | 0.043 (-0.015—0.102) | 0.1     |
| BMI*                            | 590 | 0.063<br>(-0.001—0.127) | 0.05    | 0.054 (-0.010—0.118) | 0.1     |
| Ponderal Index*                 | 590 | 0.051<br>(-0.011—0.112) | 0.1     | 0.045 (-0.017—0.107) | 0.2     |
| Flank skinfold thickness*       | 592 | 0.032<br>(-0.042—0.105) | 0.4     | 0.017 (-0.056—0.089) | 0.7     |
| Quadriceps skinfold thickness*  | 592 | 0.050<br>(-0.013—0.112) | 0.1     | 0.042 (-0.020—0.105) | 0.2     |
| Subscapular skinfold thickness* | 592 | 0.069<br>(-0.001—0.139) | 0.05    | 0.061 (-0.009—0.132) | 0.09    |
| Triceps skinfold thickness*     | 592 | 0.062<br>(-0.009—0.133) | 0.09    | 0.056 (-0.015—0.126) | 0.1     |

Values in the table only include data from those pregnancies where GDM status was available. Standardized  $\beta$ s are presented as means (95% confidence intervals). All models adjusted for gestational age at birth, parity, smoking during pregnancy, offspring sex and maternal pre-pregnancy BMI. \*Models additionally adjusted for age at assessment.



**Table S6** Subgroup comparison assessing the effect of maternal weight gain in pregnancy on associations between iron supplementation in pregnancy and offspring size at birth.

| Measure                         | N   | Unadjusted for maternal weight gain |         | Adjusted for maternal weight gain |         |
|---------------------------------|-----|-------------------------------------|---------|-----------------------------------|---------|
|                                 |     | Standardized $\beta$                | p-value | Standardized $\beta$              | p-value |
| Weight                          | 632 | 0.075 (0.012—0.137)                 | 0.02    | 0.067 (0.005—0.128)               | 0.03    |
| Length*                         | 619 | 0.038 (-0.020—0.095)                | 0.2     | 0.031 (-0.025—0.088)              | 0.3     |
| Head Circumference*             | 618 | 0.089 (0.033—0.144)                 | 0.002   | 0.084 (0.029—0.139)               | 0.003   |
| BMI*                            | 618 | 0.078 (0.017—0.138)                 | 0.01    | 0.074 (0.013—0.134)               | 0.02    |
| Ponderal Index*                 | 618 | 0.061 (0.002—0.120)                 | 0.04    | 0.059 (0—0.119)                   | 0.05    |
| Flank skinfold thickness*       | 617 | 0.082 (0.012—0.151)                 | 0.02    | 0.080 (0.010—0.150)               | 0.02    |
| Quadriceps skinfold thickness*  | 617 | 0.059 (-0.003—0.121)                | 0.06    | 0.056 (-0.006—0.118)              | 0.08    |
| Subscapular skinfold thickness* | 618 | 0.105 (0.036—0.174)                 | 0.003   | 0.100 (0.031—0.169)               | 0.005   |
| Triceps skinfold thickness*     | 617 | 0.120 (0.047—0.193)                 | 0.001   | 0.116 (0.043—0.189)               | 0.002   |

Values in the table only include data from those pregnancies where maternal weight gain in pregnancy was available. Standardized  $\beta$ s are presented as means (95% confidence intervals). All models adjusted for gestational age at birth, parity, smoking during pregnancy, offspring sex and maternal pre-pregnancy BMI. \*Models additionally adjusted for age at assessment.
